# Supplementary material
Source: PubMed Central journal article supplement (PMC2833365)
Supplement: mmc1.pdf [file mmc1.pdf]

American Journal of Human Genetics, Volume 86

## **Supplemental Data**

### **Using Principal Components of Genetic Variation**

### **for Robust and Powerful Detection of Gene-Gene**

### **Interactions in Case-Control and Case-Only Studies**

**Samsiddhi Bhattacharjee, Zhaoming Wang, Julia Ciampa, Peter Kraft, Stephen Chanock, Kai Yu, and Nilanjan Chatterjee**

#### TABLE OF CONTENTS

Table S1. List of allele frequencies of causal SNPs and baseline disease risks for the simulation study of type I error and power (Table 1 and Figure 5).

**Table S1.** List of allele frequencies of causal SNPs and baseline disease risks for the simulation study of type I error and power (Table 1 and Figure 5).

| Stratum No. | Tertile along PC-s |     |     |     | Common MAF of Causal SNPs | Baseline Disease Risk |               |
|-------------|--------------------|-----|-----|-----|---------------------------|-----------------------|---------------|
|             | PC1                | PC2 | PC3 | PC4 |                           | Correlated**          | Uncorrelated* |
| 1           | 1                  | 1   | 1   | 1   | 0.1500                    | 0.0050                | 0.0118        |
| 2           | 1                  | 1   | 1   | 2   | 0.1525                    | 0.0054                | 0.0121        |
| 3           | 1                  | 1   | 1   | 3   | 0.1544                    | 0.0057                | 0.0124        |
| 4           | 1                  | 1   | 2   | 1   | 0.1562                    | 0.0057                | 0.0156        |
| 5           | 1                  | 1   | 2   | 2   | 0.1638                    | 0.0061                | 0.0159        |
| 6           | 1                  | 1   | 2   | 3   | 0.1694                    | 0.0065                | 0.0104        |
| 7           | 1                  | 1   | 3   | 1   | 0.1626                    | 0.0065                | 0.0110        |
| 8           | 1                  | 1   | 3   | 2   | 0.1757                    | 0.0070                | 0.0171        |
| 9           | 1                  | 1   | 3   | 3   | 0.1856                    | 0.0074                | 0.0126        |
| 10          | 1                  | 2   | 1   | 1   | 0.1630                    | 0.0070                | 0.0099        |
| 11          | 1                  | 2   | 1   | 2   | 0.1731                    | 0.0075                | 0.0103        |
| 12          | 1                  | 2   | 1   | 3   | 0.1806                    | 0.0079                | 0.0103        |
| 13          | 1                  | 2   | 2   | 1   | 0.1831                    | 0.0079                | 0.0147        |
| 14          | 1                  | 2   | 2   | 2   | 0.2000                    | 0.0085                | 0.0141        |
| 15          | 1                  | 2   | 2   | 3   | 0.2127                    | 0.0090                | 0.0158        |
| 16          | 1                  | 2   | 3   | 1   | 0.2051                    | 0.0090                | 0.0119        |
| 17          | 1                  | 2   | 3   | 2   | 0.2299                    | 0.0097                | 0.0122        |
| 18          | 1                  | 2   | 3   | 3   | 0.2487                    | 0.0102                | 0.0138        |
| 19          | 1                  | 3   | 1   | 1   | 0.1687                    | 0.0080                | 0.0115        |
| 20          | 1                  | 3   | 1   | 2   | 0.1823                    | 0.0086                | 0.0139        |
| 21          | 1                  | 3   | 1   | 3   | 0.1924                    | 0.0090                | 0.0116        |
| 22          | 1                  | 3   | 2   | 1   | 0.1953                    | 0.0091                | 0.0115        |
| 23          | 1                  | 3   | 2   | 2   | 0.2166                    | 0.0098                | 0.0134        |
| 24          | 1                  | 3   | 2   | 3   | 0.2328                    | 0.0103                | 0.0097        |
| 25          | 1                  | 3   | 3   | 1   | 0.2249                    | 0.0103                | 0.0123        |
| 26          | 1                  | 3   | 3   | 2   | 0.2555                    | 0.0111                | 0.0104        |
| 27          | 1                  | 3   | 3   | 3   | 0.2788                    | 0.0117                | 0.0120        |
| 28          | 2                  | 1   | 1   | 1   | 0.1584                    | 0.0061                | 0.0097        |
| 29          | 2                  | 1   | 1   | 2   | 0.1629                    | 0.0066                | 0.0134        |
| 30          | 2                  | 1   | 1   | 3   | 0.1662                    | 0.0070                | 0.0153        |
| 31          | 2                  | 1   | 2   | 1   | 0.1713                    | 0.0070                | 0.0102        |
| 32          | 2                  | 1   | 2   | 2   | 0.1816                    | 0.0075                | 0.0120        |
| 33          | 2                  | 1   | 2   | 3   | 0.1891                    | 0.0079                | 0.0084        |
| 34          | 2                  | 1   | 3   | 1   | 0.1851                    | 0.0080                | 0.0121        |
| 35          | 2                  | 1   | 3   | 2   | 0.2019                    | 0.0086                | 0.0213        |
| 36          | 2                  | 1   | 3   | 3   | 0.2144                    | 0.0090                | 0.0114        |
| 37          | 2                  | 2   | 1   | 1   | 0.1816                    | 0.0086                | 0.0107        |
| 38          | 2                  | 2   | 1   | 2   | 0.1947                    | 0.0092                | 0.0144        |
| 39          | 2                  | 2   | 1   | 3   | 0.2044                    | 0.0097                | 0.0109        |
| 40          | 2                  | 2   | 2   | 1   | 0.2110                    | 0.0097                | 0.0115        |
| 41          | 2                  | 2   | 2   | 2   | 0.2321                    | 0.0105                | 0.0095        |
| 42          | 2                  | 2   | 2   | 3   | 0.2480                    | 0.0110                | 0.0074        |
| 43          | 2                  | 2   | 3   | 1   | 0.2438                    | 0.0111                | 0.0108        |
| 44          | 2                  | 2   | 3   | 2   | 0.2744                    | 0.0119                | 0.0119        |
| 45          | 2                  | 2   | 3   | 3   | 0.2975                    | 0.0126                | 0.0130        |
| 46          | 2                  | 3   | 1   | 1   | 0.1919                    | 0.0098                | 0.0133        |

|    |   |   |   |   |        |        |        |
|----|---|---|---|---|--------|--------|--------|
| 47 | 2 | 3 | 1 | 2 | 0.2091 | 0.0105 | 0.0150 |
| 48 | 2 | 3 | 1 | 3 | 0.2220 | 0.0111 | 0.0087 |
| 49 | 2 | 3 | 2 | 1 | 0.2293 | 0.0112 | 0.0133 |
| 50 | 2 | 3 | 2 | 2 | 0.2558 | 0.0120 | 0.0087 |
| 51 | 2 | 3 | 2 | 3 | 0.2757 | 0.0126 | 0.0104 |
| 52 | 2 | 3 | 3 | 1 | 0.2715 | 0.0127 | 0.0123 |
| 53 | 2 | 3 | 3 | 2 | 0.3088 | 0.0137 | 0.0123 |
| 54 | 2 | 3 | 3 | 3 | 0.3369 | 0.0144 | 0.0162 |
| 55 | 3 | 1 | 1 | 1 | 0.1748 | 0.0090 | 0.0111 |
| 56 | 3 | 1 | 1 | 2 | 0.1833 | 0.0096 | 0.0145 |
| 57 | 3 | 1 | 1 | 3 | 0.1896 | 0.0102 | 0.0098 |
| 58 | 3 | 1 | 2 | 1 | 0.2021 | 0.0102 | 0.0092 |
| 59 | 3 | 1 | 2 | 2 | 0.2179 | 0.0110 | 0.0148 |
| 60 | 3 | 1 | 2 | 3 | 0.2296 | 0.0116 | 0.0179 |
| 61 | 3 | 1 | 3 | 1 | 0.2324 | 0.0116 | 0.0155 |
| 62 | 3 | 1 | 3 | 2 | 0.2569 | 0.0125 | 0.0099 |
| 63 | 3 | 1 | 3 | 3 | 0.2752 | 0.0132 | 0.0084 |
| 64 | 3 | 2 | 1 | 1 | 0.2196 | 0.0125 | 0.0162 |
| 65 | 3 | 2 | 1 | 2 | 0.2392 | 0.0134 | 0.0124 |
| 66 | 3 | 2 | 1 | 3 | 0.2538 | 0.0141 | 0.0146 |
| 67 | 3 | 2 | 2 | 1 | 0.2697 | 0.0142 | 0.0146 |
| 68 | 3 | 2 | 2 | 2 | 0.2997 | 0.0152 | 0.0117 |
| 69 | 3 | 2 | 2 | 3 | 0.3222 | 0.0161 | 0.0139 |
| 70 | 3 | 2 | 3 | 1 | 0.3264 | 0.0161 | 0.0102 |
| 71 | 3 | 2 | 3 | 2 | 0.3682 | 0.0173 | 0.0135 |
| 72 | 3 | 2 | 3 | 3 | 0.3991 | 0.0183 | 0.0173 |
| 73 | 3 | 3 | 1 | 1 | 0.2405 | 0.0143 | 0.0145 |
| 74 | 3 | 3 | 1 | 2 | 0.2655 | 0.0153 | 0.0103 |
| 75 | 3 | 3 | 1 | 3 | 0.2842 | 0.0162 | 0.0123 |
| 76 | 3 | 3 | 2 | 1 | 0.3015 | 0.0162 | 0.0110 |
| 77 | 3 | 3 | 2 | 2 | 0.3383 | 0.0175 | 0.0145 |
| 78 | 3 | 3 | 2 | 3 | 0.3657 | 0.0184 | 0.0173 |
| 79 | 3 | 3 | 3 | 1 | 0.3705 | 0.0185 | 0.0135 |
| 80 | 3 | 3 | 3 | 2 | 0.4197 | 0.0199 | 0.0180 |
| 81 | 3 | 3 | 3 | 3 | 0.4557 | 0.0209 | 0.0116 |

\*\* Disease risk ( $\alpha_S$ ) varies along the same direction as common MAF ( $p_S$ ) of the two causal SNPs (i.e. monotonically along tertiles of each PC). The following two models were used (here  $i_1, i_2, i_3$  and  $i_4$  denote tertiles of the 4 significant PC-s for the  $S^{\text{th}}$  stratum).

$$\log(p_S/p_0) = \sum_{j=1}^4 a_j \psi_j(i_j - 1) + \sum_j \sum_{k < j} a_{jk} \psi_j(i_j - 1) \psi_k(i_k - 1) \text{ and}$$

$$\log(\alpha_S/\alpha_0) = \sum_{j=1}^4 A_j \psi_j(i_j - 1), \text{ where } a_j > 0, a_{jk} > 0, A_j > 0, \forall j, k$$

with  $\psi_1(x) = x\sqrt{x}$ ,  $\psi_2(x) = \sqrt{x}$ ,  $\psi_3(x) = x$ ,  $\psi_4(x) = \log(1+x)$

\* Disease risk varies randomly independent of the principal components,  
 $\text{logit}(\alpha_S) \sim iid N(\mu, \sigma^2)$ , for  $S = 1, \dots, 81$
